# Supplementary material for: Compliance With Mobile Ecological Momentary Assessment Protocols in Children and Adolescents: A Systematic Review and Meta-Analysis
Source: PubMed Central journal article supplement (PMC5425774; doi:10.2196/jmir.6641), 2017-04-26
Supplement: jmir_v19i4e132_app2.pdf [file jmir_v19i4e132_app2.pdf]

Table 2. Ecological momentary assessment (EMA) study with time-based design.

| #      | Author<br>Year      | Prompting schedule                                                                                                           | Length of<br>study<br>(days) | # of<br>prompt<br>per day | Reported<br>compliance<br>mean (SD <sup>a</sup> ;<br>range) | Compliance definition                              |
|--------|---------------------|------------------------------------------------------------------------------------------------------------------------------|------------------------------|---------------------------|-------------------------------------------------------------|----------------------------------------------------|
| 2<br>7 | Helgeson<br>2009    | Every 2 h during<br>wake time on<br>weekend days                                                                             | 2                            | 6-8                       | 7 (NR <sup>b</sup> ; 2-9)<br>entries per day                | # of prompts<br>answered <sup>c</sup>              |
| 4<br>2 | Mason<br>2015       | Random time:<br>After 4:00 pm to<br>evening                                                                                  | 4                            | 3                         | NR                                                          | N/A <sup>d</sup>                                   |
| 7      | Dunton<br>2011      | Random time:<br>3 on weekday<br>7 on weekend                                                                                 | 4                            | 3-7                       | 80.0% (NR; 7-<br>100%)                                      | % of prompts<br>answered                           |
| 1      | Dunton<br>2007      | Every 30 min (SD 10)<br>during waking hours                                                                                  | 4                            | 25+ <sup>e</sup>          | 83.0% (9.4; NR)                                             | % of prompts<br>answered                           |
| 2<br>4 | Lewandowski<br>2009 | Sampling<br>Prompts at(1) 9:00-<br>10:00,<br>(2) 11:00-12:00,<br>(3) 14:00-15:00,<br>(4) 17:00-18:00, and<br>(5) 20:00-21:00 | 5                            | 5                         | 93.3% (NR; NR)                                              | % of prompts<br>answered overall <sup>f</sup>      |
| 2<br>0 | Roekel<br>2014      | Random in each 90-<br>min interval                                                                                           | 6                            | 9                         | 37 (11.1; NR)<br>entries                                    | # of prompts<br>answered individually <sup>g</sup> |
| 3<br>9 | Rhee<br>2015        | One random prompt<br>each at:<br>(1) 6:00-12:00                                                                              | 7                            | 2                         | NR                                                          | N/A                                                |

|        |                 |                                                                                                          |   |     |                            |                                                                                 |
|--------|-----------------|----------------------------------------------------------------------------------------------------------|---|-----|----------------------------|---------------------------------------------------------------------------------|
|        |                 | (2) 18:00-0:00                                                                                           |   |     |                            |                                                                                 |
| 3<br>8 | Chin<br>2016    | Once random prompt<br>each at:<br>(1) morning<br>(2) afternoon                                           | 7 | 2   | 96.2% (NR; NR)             | % of prompts<br>responded<br>individually                                       |
| 9      | Kim<br>2013     | One random prompt<br>each at:<br>(1) 12:50<br>(2) 16:30<br>(3) 20:00                                     | 7 | 3   | 95.5% (6.0; NR)            | % of prompts<br>answered individually<br>within 30 min from<br>the first signal |
| 4      | Reid<br>2009    | One random prompt<br>each at:<br>(1) 8:00-11:00<br>(2) 11:00-15:00<br>(3) 15:00-20:00<br>(4) 20:00-22:00 | 7 | 4   | 76.0% (NR; NR-<br>28)      | % of prompts<br>answered                                                        |
| 1<br>8 | Johnson<br>2014 | Fixed time:<br>(1) 7:30<br>(2) 11:20am or<br>11:40am<br>(3) 4:15<br>(4) 7:30                             | 7 | 4   | 80.2% (14.2;<br>40.9-100%) | % of prompts<br>answered individually                                           |
| 6      | Suveg<br>2010   | Random time:<br>4 times between 4pm<br>and 8pm                                                           | 7 | 4   | 60.0% (NR; NR)             | % of prompts<br>answered                                                        |
| 2<br>2 | Dunton<br>2015  | Random time:<br>3 on weekday                                                                             | 7 | 3-7 | 69.0% (NR; 25-<br>100%)    | % of prompts<br>answered individually                                           |

|        |                    |                                                                                                                                                |   |                  |                                                                                             |                                                   |
|--------|--------------------|------------------------------------------------------------------------------------------------------------------------------------------------|---|------------------|---------------------------------------------------------------------------------------------|---------------------------------------------------|
|        |                    | 7 on weekend                                                                                                                                   |   |                  |                                                                                             |                                                   |
| 3<br>7 | Dunton<br>2015     | Once every 2 h<br>(1) 15:00-21:00<br>(weekday)<br>(2) 7:00-21:00<br>(weekend)                                                                  | 7 | 3-7              | 54.6% (NR; NR)                                                                              | % of prompts<br>answered                          |
| 1<br>1 | Rusby<br>2013      | Every 90-120 min<br>between:<br>Monday to Thursday:<br>15:30-21:30<br>Friday: 15:30-23:00<br>Saturday: 11:30-<br>23:00 Sunday: 11:30-<br>21:30 | 7 | 4-6              | 75.0% (NR; NR)                                                                              | % of prompts<br>answered individually<br>by waves |
| 2<br>1 | Sokolovsky<br>2014 | Random time                                                                                                                                    | 7 | 5-7              | 68.1% (16.9%;<br>NR)                                                                        | % of prompts<br>answered individually             |
| 2      | Weinstein<br>2006  | Random time                                                                                                                                    | 7 | 5-7              | 85.0% (14.0%;<br>NR)                                                                        | % of prompts<br>answered individually             |
| 2<br>3 | Whalen<br>2006     | Each 30 min (SD 5)<br>during nonschool<br>hours                                                                                                | 7 | 25+ <sup>e</sup> | NR (NR; 71-<br>100%)<br>ADHD <sup>h</sup> : 89.0%<br>(NR; NR)<br>Control: 90.0%<br>(NR; NR) | % of prompts<br>answered individually             |
| 1<br>3 | Grenard<br>2013    | Once each<br>(1) 9:00-12:00<br>(weekend)<br>(2) 12:00-15:00<br>(weekend)<br>(3) 15:00-18:00                                                    | 9 | 3-5              | 71.0% (NR; NR)                                                                              | % of prompts<br>answered                          |

|        |                              |                                                                                           |    |     |                        |                                                       |
|--------|------------------------------|-------------------------------------------------------------------------------------------|----|-----|------------------------|-------------------------------------------------------|
|        |                              | (4) 18:00-21:00                                                                           |    |     |                        |                                                       |
| 3<br>1 | Stinson<br>2013              | Once each:<br>(1) morning<br>(2) afternoon<br>(3) evening                                 | 14 | 2   | 81.0% (22%;<br>NR)     | % of prompts<br>answered individually                 |
| 8      | Scharf<br>2013               | 2 random prompt<br>between 10:00 and<br>22:00                                             | 14 | 2   | 82.0% (NR; NR)         | % of prompts<br>answered individually<br>within 2 min |
| 5      | Nock<br>2009                 | Once each at<br>(1) mid-day<br>(2) end-of-day                                             | 14 | 2   | 83.3%                  | % of participants<br>completed at least 28<br>entries |
| 1<br>4 | Rahdar<br>2014               | NR                                                                                        | 14 | 3   | NR                     | N/A                                                   |
| 2<br>5 | Connelly 2009                | Once each at:<br>(1) before school<br>(2) after school<br>(3) evening                     | 14 | 3   | 84.0% (NR; NR)         | % of prompts<br>answered individually                 |
| 3<br>4 | Stinson<br>2008 <sup>e</sup> | Once each at:<br>(1) morning<br>(2) afternoon<br>(3) evening                              | 14 | 3   | 78.0% (NR; NR)         | % of prompts<br>answered                              |
| 1<br>7 | Ranzenhofer<br>2014          | Once each during:<br>(1) 11:10 (weekend)<br>(2) 13:50 (weekend)<br>(3) 16:30<br>(4) 19:10 | 14 | 3-5 | 69.4% (NR; 38-<br>90%) | % of prompts<br>answered individually                 |

|        |                |                                                                                                                                    |    |     |                          |                                       |
|--------|----------------|------------------------------------------------------------------------------------------------------------------------------------|----|-----|--------------------------|---------------------------------------|
|        |                | (5) 23:50                                                                                                                          |    |     |                          |                                       |
| 1<br>5 | Garcia<br>2014 | Weekdays:<br>(1) 06:30<br>(2) 14:30<br>(3) 18:00<br>(4) 21:00<br><br>Weekends:<br>(1) 10:30<br>(2) 15:00<br>(3) 18:00<br>(4) 21:30 | 14 | 4   | 79.6% (NR;<br>70.5-88.7) | % of prompts<br>answered individually |
| 3<br>3 | Khor<br>2014   | Once each during:<br>(1) 07:30-08:30<br>(2) 17:00-18:20<br>(3) 18:20-19:40<br>(4) 19:40-21:00                                      | 14 | 4   | 61.8% (30.0;<br>NR)      | % of prompts<br>answered              |
| 3<br>2 | Borus<br>2013  | Personalized time:<br>4 times, according to<br>participants' blood<br>glucose check time                                           | 14 | 4   | 63.0% (NR; 0-<br>97%)    | % of prompt<br>answered (median)      |
| 1<br>2 | Bickham 2013   | Random intervals                                                                                                                   | 14 | 4-7 | 66.0% (NR; NR)           | % of prompts<br>answered              |
| 1<br>0 | Crooke<br>2013 | Once during:<br>(1) 08:00-11:00<br>(2) 11:00-15:00<br>(3) 15:00-20:00                                                              | 20 | 4   | NR                       | N/A                                   |

|        |                              |                                                                        |    |   |                        |                                                         |
|--------|------------------------------|------------------------------------------------------------------------|----|---|------------------------|---------------------------------------------------------|
|        |                              | (4) 20:00-22:00                                                        |    |   |                        |                                                         |
| 3<br>5 | Stinson<br>2008 <sup>i</sup> | Once each at:<br>(1) morning<br>(2) afternoon<br>(3) evening           | 21 | 3 | 73.0% (NR; NR)         | % of prompts answered                                   |
| 3      | Gwaltney<br>2007             | Once every 3.5-h interval between 8:00 and 22:00                       | 21 | 4 | 75.0% (NR; 53-94%)     | % of prompts answered                                   |
| 1<br>9 | Hoepfner<br>2014             | Once every 3.5-h interval between 8:00 and 22:00                       | 21 | 4 | 88.4% (6.6%; NR)       | % of prompts answered individually                      |
| 2<br>6 | Bjorling<br>2009             | 7 random time prompts during wake time                                 | 21 | 7 | 72.0% (NR; 30-90%)     | % of prompts answered individually                      |
| 2<br>8 | Rosen<br>2012                | Once each at:<br>(1) before school<br>(2) after school<br>(3) evening  | 28 | 3 | 77.0% (NR; 1.5; 46-NR) | % of prompts answered individually                      |
| 2<br>9 | Connelly 2012                | Once each at:<br>(1) after school<br>(2) dinner time<br>(3) before bed | 28 | 3 | 2.1 (0.46; NR)         | # of prompts answered individually per day <sup>i</sup> |
| 3<br>0 | Rosen<br>2013                | Once each at:<br>(1) before school<br>(2) after school<br>(3) evening  | 28 | 3 | 84.4% (NR; NR)         | % of prompts answered individually                      |
| 4<br>1 | Bromberg<br>2015             | Once each at:                                                          | 28 | 3 | 56.2% (18.4; 25-91)    | # of diaries completed <sup>k</sup>                     |

|                                                                                                                                                                                                                                                                                                                           |                 |                                                                            |    |   |                |                       |
|---------------------------------------------------------------------------------------------------------------------------------------------------------------------------------------------------------------------------------------------------------------------------------------------------------------------------|-----------------|----------------------------------------------------------------------------|----|---|----------------|-----------------------|
|                                                                                                                                                                                                                                                                                                                           |                 | (1) morning<br>(2) afternoon<br>(3) evening                                |    |   |                |                       |
| <sup>a</sup> SD: standard deviation.<br><sup>b</sup> NR: not reported.                                                                                                                                                                                                                                                    |                 |                                                                            |    |   |                |                       |
| <sup>c</sup> Converted to 77% (NR; 11-100.0%) for meta-analysis.<br><sup>d</sup> N/A not applicable.<br><sup>e</sup> Other frequency: Participants were prompted every 30 min during their waking hours, yielding an average 25-30 of recording opportunities per day.<br><sup>f</sup> Only among concussed participants. | Russell<br>2015 | Once each during:<br>(1) 07:00-10:00<br>(2) 14:00-17:00<br>(3) 17:00-24:00 | 42 | 3 | 92.0% (NR; NR) | % of prompts answered |
| <sup>g</sup> Converted to 68.52% (NR; NR) for meta-analysis, based on a maximum of 54 prompts per day.<br><sup>h</sup> 2014<br><sup>i</sup> ADHD: attention deficient/hyperactivity disorder.                                                                                                                             | Dennis<br>2014  | Once every block of time that ranged from 90 to 360 min                    | 42 | 6 | 89.0% (NR; NR) | % of prompts answered |

<sup>i</sup>Two separate studies were reported in the Stinson 2008 paper.

<sup>j</sup>Converted to 68.67% (NR; NR; 41-100%) for meta-analysis, based on a maximum of 3 prompts per day.
